# Supplementary material
Source: PubMed Central journal article supplement (PMC6960360)
Supplement: NIHMS1055285-supplement-Supp_Table.pdf [file NIHMS1055285-supplement-Supp_Table.pdf]

Supplementary Table 1. Diabetes and risk of HCC in the UNOS cohort – excluding cryptogenic cirrhosis

|                   | Univariate       |        | Multivariable    |        |
|-------------------|------------------|--------|------------------|--------|
| Age (10 years)    | 1.84 (1.49-2.27) | <0.001 | 1.84 (1.48-2.28) | <0.001 |
| Male              | 1.63 (1.25-2.14) | <0.001 | 1.78 (1.35-2.34) | <0.001 |
| Non White Race    | 1.06 (0.76-1.51) | 0.71   |                  |        |
| CTP               | 1.09 (1.00-1.18) | 0.045  |                  |        |
| MELD (per 5 unit) | 1.00 (0.97-1.03) | 0.87   |                  |        |
| Diabetes          | 1.64 (1.21-2.20) | 0.001  | 1.48 (1.10-2.00) | 0.011  |
| BMI               | 1.01 (0.99-1.03) | 0.47   |                  |        |
| Albumin           | 0.73 (0.58-0.93) | 0.009  | 0.70 (0.56-0.89) | 0.004  |
| INR               | 1.13 (0.74-1.74) | 0.57   |                  |        |
| Creatinine        | 0.81 (0.64-1.04) | 0.10   |                  |        |
| Bilirubin         | 1.02 (0.97-1.08) | 0.46   |                  |        |

Supplementary Table 2. Diabetes and risk of HCC in UNOS cohort – excluding MELD > 15

|                   | Univariate       |        | Multivariable     |        |
|-------------------|------------------|--------|-------------------|--------|
| Age (10 years)    | 1.71 (1.41-2.07) | <0.001 | 1.71 (1.41-2.08)  | <0.001 |
| Male              | 1.58 (1.23-2.03) | <0.001 | 1.71 (1.32-2.20)  | <0.001 |
| Non White Race    | 0.95 (0.70-1.29) | 0.74   |                   |        |
| CTP               | 1.15 (1.06-1.26) | 0.002  |                   |        |
| MELD (per 5 unit) | 1.06 (1.00-1.11) | 0.041  |                   |        |
| Diabetes          | 1.45 (1.10-1.89) | 0.007  | 1.34 (1.03, 1.76) | 0.033  |
| BMI               | 1.00 (0.98-1.03) | 0.87   |                   |        |
| Albumin           | 0.72 (0.57-0.90) | 0.004  | 0.70 (0.55-0.88)  | 0.002  |
| INR               | 1.57 (0.76-3.23) | 0.22   |                   |        |
| Creatinine        | 0.87 (0.57-1.31) | 0.50   |                   |        |
| Bilirubin         | 1.23 (1.08-1.39) | 0.002  |                   |        |
